# Supplementary material
Source: PubMed Central journal article supplement (PMC4053071)
Supplement: bi500339j_si_001.pdf [file bi500339j_si_001.pdf]

## Supplementary Material

for

### Tebipenem, a New Carbapenem Antibiotic is a Slow Substrate that Inhibits the $\beta$ - Lactamase from *Mycobacterium tuberculosis*

Saugata Hazra, Hua Xu, and John S. Blanchard\*

Department of Biochemistry, Albert Einstein College of Medicine, 1300 Morris Park Avenue,  
Bronx, New York 10461 Telephone: (718) 430-3096; Fax: (718) 430-8565. Email:  
[john.blanchard@einstein.yu.edu](mailto:john.blanchard@einstein.yu.edu)

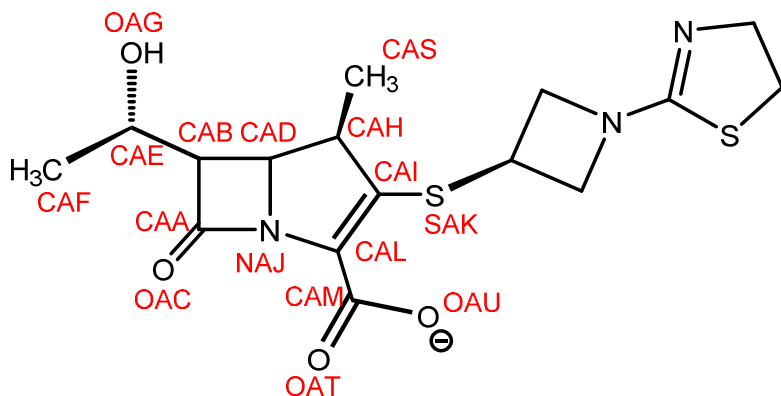

Numbering of tebipenem and meropenem common atoms used in Table S1

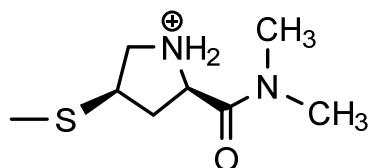

Side chain of meropenem

| <b>Table S1: Interactions of Tebipenem and Meropenem covalent adducts with M. tuberculosis <math>\beta</math>-lactamase.</b> |                |           |              |           |                |           |              |
|------------------------------------------------------------------------------------------------------------------------------|----------------|-----------|--------------|-----------|----------------|-----------|--------------|
| Tebipenem                                                                                                                    | Protein (BlaC) |           | Distance (Å) | Meropenem | Protein (BlaC) |           | Distance (Å) |
|                                                                                                                              | Residue        | Atom Name |              |           | Residue        | Atom Name |              |
| CAE                                                                                                                          | Ser70          | OG        | 3.1          | CBE       | HOH697         | O         | 3.4          |
|                                                                                                                              | Glu166         | OE2       | 3.5          | N         | HOH697         | O         | 3.4          |
|                                                                                                                              | HOH572         | O         | 3.4          | CAS       | Thr239         | O         | 3.5          |
| OAG                                                                                                                          | Ser70          | OG        | 2.7          |           | HOH639         | O         | 3.4          |
|                                                                                                                              | Glu166         | OE2       | 2.7          | CAM       | Thr237         | OG1       | 3.3          |
|                                                                                                                              | Lys73          | CE        | 3.4          | OAT       | Thr237         | OG1       | 2.5          |
|                                                                                                                              | Lys73          | NZ        | 2.6          |           | Ser130         | OG        | 3.4          |
|                                                                                                                              | Glu166         | CD        | 3.2          |           | Thr237         | C         | 3.3          |
|                                                                                                                              | HOH572         | O         | 3.2          |           | Thr237         | O         | 3.4          |
| CAB                                                                                                                          | Ser70          | OG        | 2.6          | OAU       | HOH520         | O         | 2.7          |
| CAA                                                                                                                          | Ser70          | OG        | 1.4          |           | HOH520         | OG1       | 3.5          |
|                                                                                                                              | Ser70          | CA        | 3.3          |           | Thr237         | OG1       | 3.2          |
|                                                                                                                              | Ser70          | CB        | 2.5          | NAJ       | Ser130         | OG        | 2.7          |
|                                                                                                                              | Ser70          | N         | 3.3          |           | Ser70          | OG        | 3.0          |
|                                                                                                                              | HOH572         | O         | 2.9          |           | Ser130         | CB        | 3.3          |
| OAC                                                                                                                          | Ser70          | N         | 2.8          | CAD       | Ser70          | OG        | 3.2          |
|                                                                                                                              | Thr239         | N         | 2.8          | CAB       | Ser70          | OG        | 2.5          |
|                                                                                                                              | Ser70          | CA        | 3.3          | CAE       | Ser70          | OG        | 2.9          |
|                                                                                                                              | Ser70          | CB        | 2.7          |           | Glu166         | OE1       | 3.4          |
|                                                                                                                              | Ser70          | OG        | 2.3          |           | Glu166         | OE2       | 3.4          |
|                                                                                                                              | Thr239         | O         | 2.9          |           | HOH572         | O         | 3.2          |
|                                                                                                                              | HOH572         | O         | 3.4          | CAF       | HOH514         | O         | 3.3          |
| CAD                                                                                                                          | Ser70          | OG        | 3.1          | OAG       | Glu166         | OE2       | 2.7          |
| NAJ                                                                                                                          | Ser70          | OG        | 2.8          |           | Ser70          | OG        | 2.8          |
|                                                                                                                              | Ser130         | OG        | 2.8          |           | Lys73          | CE        | 3.4          |
|                                                                                                                              | Ser70          | CB        | 3.4          |           | Lys73          | NZ        | 2.6          |
|                                                                                                                              | Ser130         | CB        | 3.4          |           | Glu166         | CD        | 3.2          |
| CAL                                                                                                                          | Ser130         | CB        | 3.3          |           | Glu166         | OE1       | 3.4          |
|                                                                                                                              | Ser130         | OG        | 3.2          |           | HOH572         | O         | 3.4          |
| CAM                                                                                                                          | Thr237         | OG1       | 3.4          | CAA       | Ser70          | OG        | 1.4          |
|                                                                                                                              | Thr239         | OG1       | 3.4          |           | Ser70          | CA        | 3.2          |
| OAT                                                                                                                          | Thr237         | OG1       | 2.5          |           | Ser70          | CB        | 2.4          |
|                                                                                                                              | Ser130         | OG        | 3.3          |           | Ser70          | N         | 3.1          |
|                                                                                                                              | Thr237         | C         | 3.4          |           | HOH572         | O         | 2.9          |
|                                                                                                                              | Thr237         | CB        | 3.4          | OAC       | Ser70          | N         | 2.7          |
| OAU                                                                                                                          | HOH520         | O         | 2.8          |           | Thr239         | N         | 2.9          |
|                                                                                                                              | Thr239         | OG1       | 2.9          |           | Ser70          | CA        | 3.2          |
| C17                                                                                                                          | HOH863         | O         | 3.4          |           | Ser70          | CB        | 2.7          |
| C18                                                                                                                          | HOH863         | O         | 3.1          |           | Ser70          | OG        | 2.3          |
| C23                                                                                                                          | HOH706         | O         | 3.4          |           | Gly238         | CA        | 3.3          |
| N25                                                                                                                          | HOH687         | O         | 2.9          |           | Thr239         | O         | 3.0          |
| C17                                                                                                                          | HOH863         | O         | 3.1          |           | HOH572         | O         | 3.4          |
| C18                                                                                                                          | HOH863         | O         | 3.1          |           |                |           |              |
| C20                                                                                                                          | HOH863         | O         | 3.1          |           |                |           |              |
| N19                                                                                                                          | HOH863         | O         | 3.1          |           |                |           |              |

Figure S1:

A.

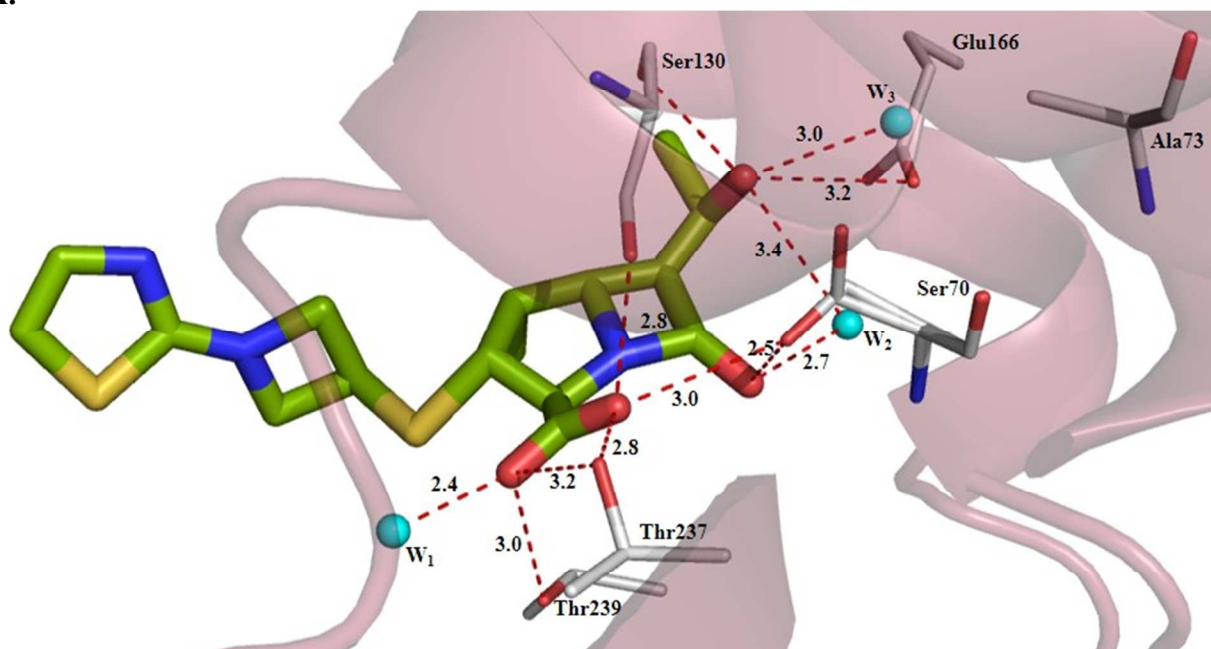

B.

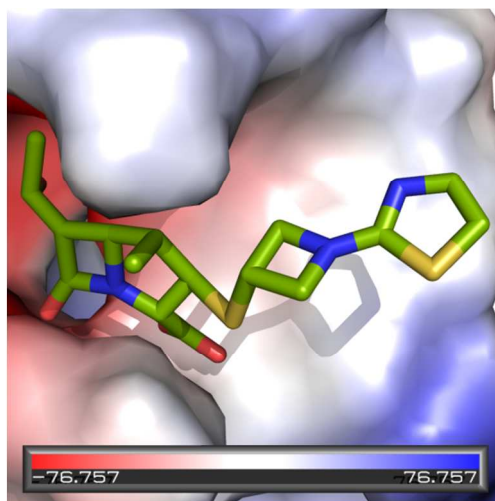

Figure S1: A. Active site molecular description of BlaC-Tebipenem Michaelis-Menten complex  
A. 3-D ribbon and ball-stick representation, B. Calculated electrostatic interaction map of BlaC-Tebipenem Michaelis-Menten complex.

Figure S2:

A.

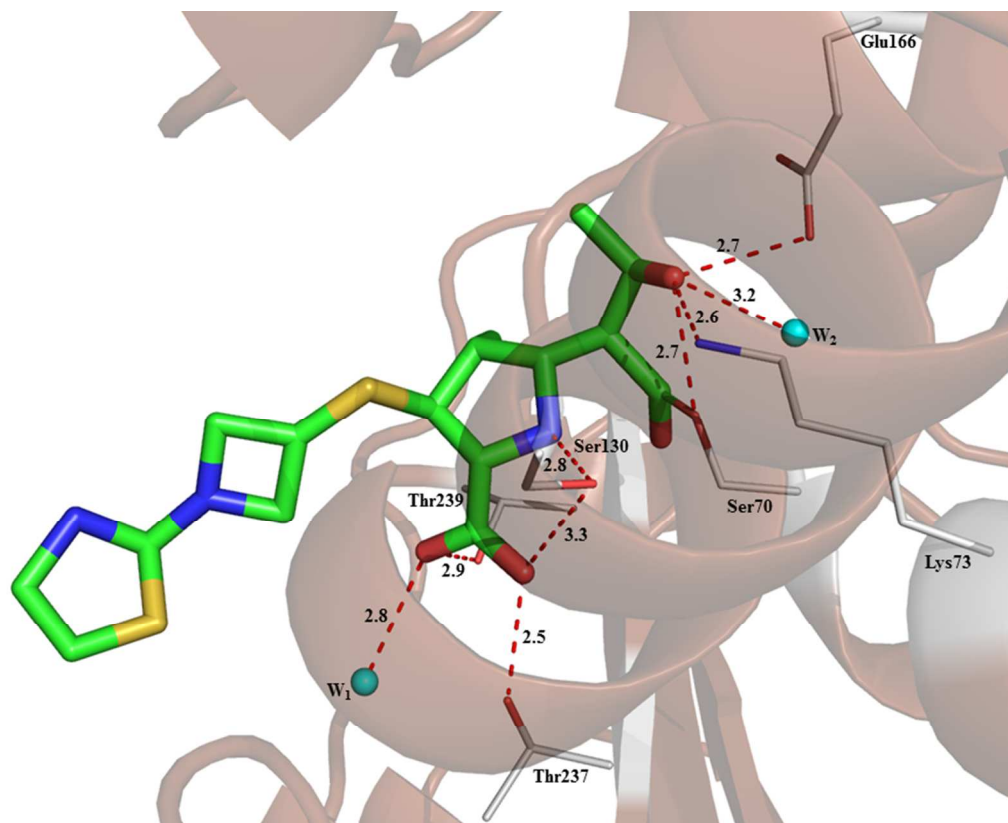

B.

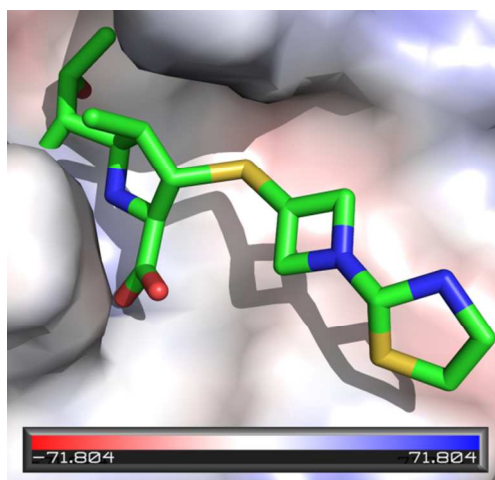

Figure S2: A. Active site molecular description of BlaC-Tebipenem covalent adduct: 3-D ribbon and ball-stick representation, B. Calculated electrostatic interaction map of BlaC-Tebipenem covalent adduct.
